# Supplementary material for: β-Glucan Extracted from Highland Barley Alleviates Dextran Sulfate Sodium-Induced Ulcerative Colitis in C57BL/6J Mice
Source: MDPI journal article supplement (doi:10.3390/molecules26195812), 2021-09-25
Supplement: s1 [file s1]

Table S1 Comparison between highland barley and other cereals

| ingredients | Summary of research results                                                                                                                                                                                                                                                          |
|-------------|--------------------------------------------------------------------------------------------------------------------------------------------------------------------------------------------------------------------------------------------------------------------------------------|
| Starch      | Compared to wheat (65-75%), corn (64-78%), rice (~90%) and barley (51-77%), highland barley had less starch (49.14-68.62%).                                                                                                                                                          |
| Protein     | Compared to rice, wheat, sorghum and corn, highland barley had more protein (6.35-23.4%).                                                                                                                                                                                            |
| Lipid       | Highland barley had 1.18-3.09% crude lipid.                                                                                                                                                                                                                                          |
| Fiber       | Highland barley contained 15.01-21.45% fibers, higher than most cereals.                                                                                                                                                                                                             |
| Mineral     | Some minerals in highland barley such as Ca (350.7-975.5mg/kg), P (3032.75mg/kg), Fe (6.32-93.7mg/kg), Cu (3.64-6.02mg/kg), Zn (16.8-30.3mg/kg), Mn (14.49-20.29mg/kg) and Se (0.007-0.323mg/kg) were higher than in corn and the content of Fe was even higher than wheat and rice. |
| Vitamins    | Highland barley had about 0.0389 mg/g-0.1084 mg/g Vitamin B, and 0.3-0.8 mg/100g Vitamin E which was higher than wheat.                                                                                                                                                              |

Table S2 Composition of experimental diets.

| Ingredient          | Regular chow(g) | HBBG diet(g) |
|---------------------|-----------------|--------------|
| Casein              | 200             | 200          |
| L-cystine           | 3               | 3            |
| Corn starch         | 315             | 215          |
| Maltodextrin        | 35              | 35           |
| Sucrose             | 350             | 350          |
| Cellulose           | 50              | 50           |
| Soybean oil         | 25              | 25           |
| Lard                | 20              | 20           |
| Mineral mixture     | 10              | 10           |
| Dicalcium phosphate | 13              | 13           |
| Calcium carbonate   | 5.5             | 5.5          |
| Sodium citrate      | 16.5            | 16.5         |
| Vitamin mixture     | 10              | 10           |
| Choline bitartrate  | 2               | 2            |
| Pigment             | 0.05            | 0.05         |
| $\beta$ -glucan     | 0               | 100          |
